# Supplementary material
Source: PubMed Central journal article supplement (PMC3059075)
Supplement: NIHMS278053-supplement-01.pdf [file NIHMS278053-supplement-01.pdf]

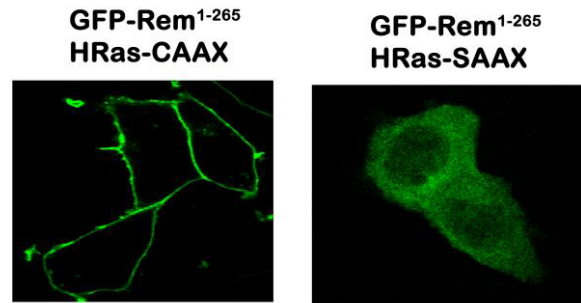

### **Supplemental Figure S1**

#### **Localization of green fluorescent protein (GFP)-Rem-(1-265)-HCAAX and GFP-Rem-(1-265)-HSAAX.**

TsA201 cells were transfected with plasmids expressing GFP-Rem-(1-265)-HCAAX or GFP-Rem-(1-265)-HSAAX. 48 h post transfection cells were examined by confocal microscopy. Note that Rem-(1-265)-HCAAX is enriched at the cell periphery, which is consistent with plasma membrane localization. However, Rem-(1-265)-HSAAX displays predominant cytosolic localization.

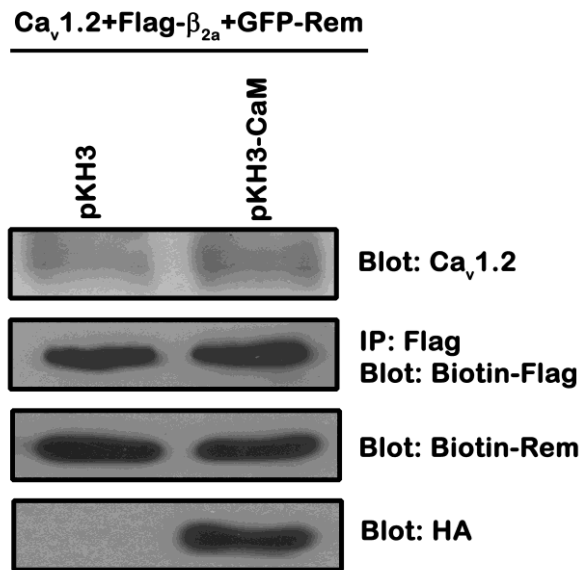

**Supplemental Figure S2**

**Overexpression of CaM does not alter expression of Ca<sup>2+</sup> channel subunits or GFP-Rem.**

TsA201 cells were transiently transfected with Ca<sub>v</sub>1.2, Flag-β<sub>2a</sub>, GFP-Rem, and pKH3-CaM or pKH3 as control. 48 hrs after the transfection, cell lysates were immunoblotted with the appropriate antibodies to monitor recombinant protein expression.

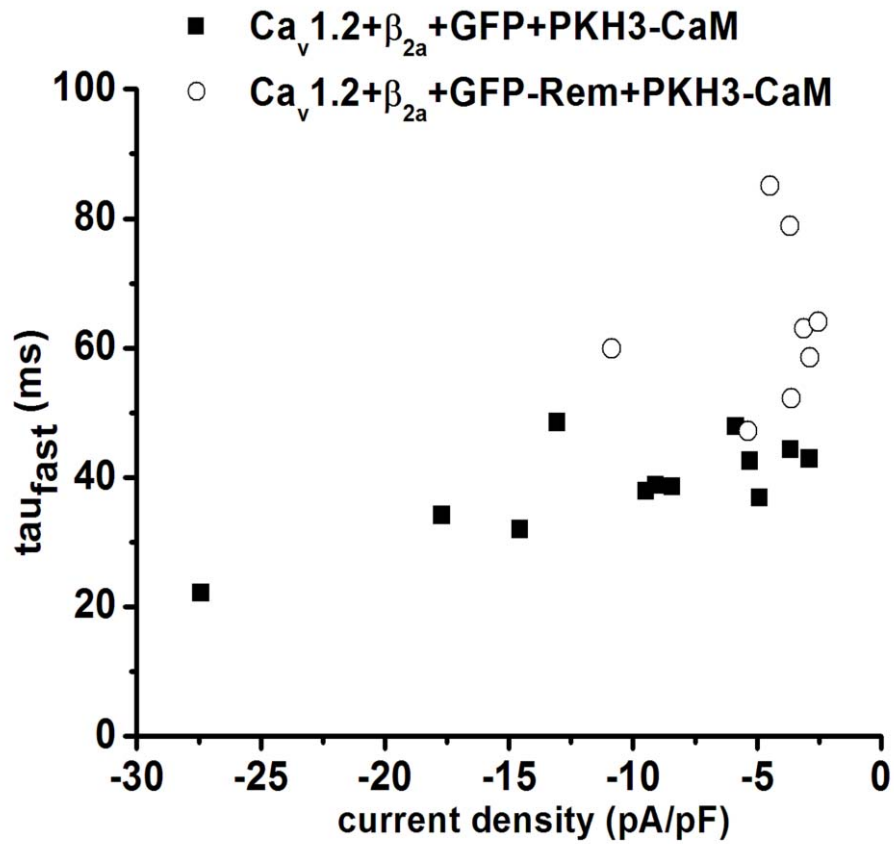

**Supplemental Figure S3**

**Relation between the fast component of the time constant of inactivation ( $\tau_{\text{fast}}$ ) and peak current density.**

$\tau_{\text{fast}}$  was derived as described under “Experimental Procedures” and plotted against the peak current density measured at +20 mV.

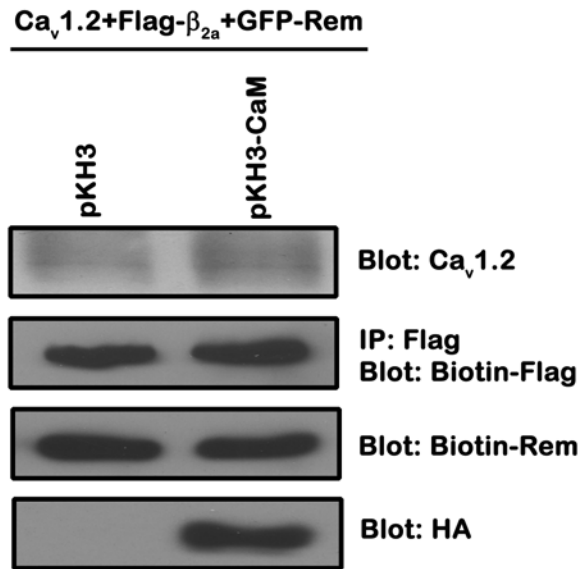

**Supplemental Figure S2**

**Overexpression of CaM does not alter expression of Ca<sup>2+</sup> channel subunits or GFP-Rem.**

TsA201 cells were transiently transfected with Ca<sub>v</sub>1.2, Flag-β<sub>2a</sub>, GFP-Rem, and pKH3-CaM or pKH3 as control. 48 hrs after the transfection, cell lysates were immunoblotted with the appropriate antibodies to monitor recombinant protein expression.

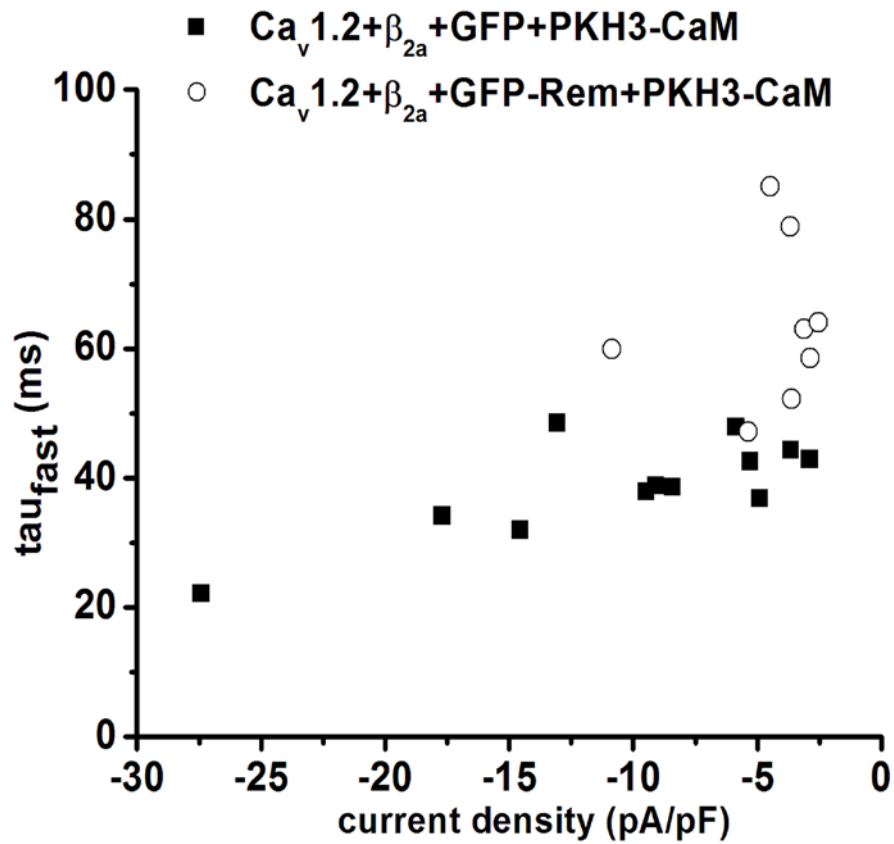

**Supplemental Figure S3**

**Relation between the fast component of the time constant of inactivation ( $\tau_{\text{fast}}$ ) and peak current density.**

$\tau_{\text{fast}}$  was derived as described under “Experimental Procedures” and plotted against the peak current density measured at +20 mV.

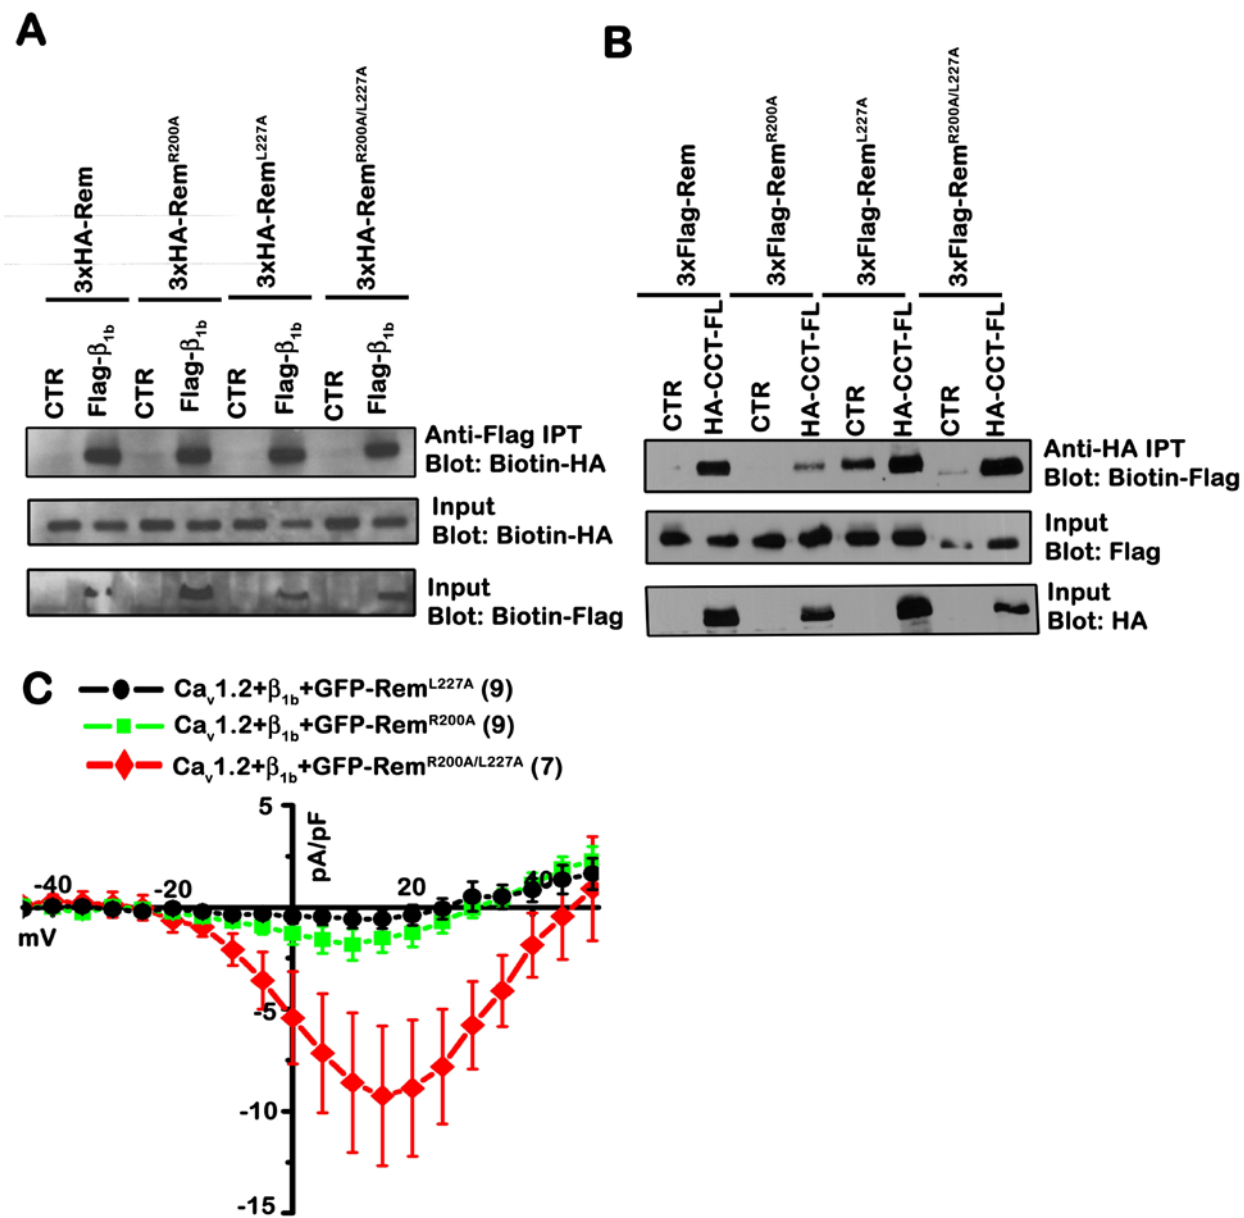

### Reviewer Figure R1.

**Analysis of putative β-null Rem mutants.** **A**, TsA201 cells were transiently co-transfected with plasmids expressing HA-tagged Rem, Rem<sup>R200A</sup>, Rem<sup>L227A</sup>, or Rem<sup>R200A/L227A</sup>, and either empty pCMV7/F2 or Flag-β<sub>1b</sub>. Co-immunoprecipitation was performed with Flag antibody and interaction with Rem proteins examined by immunoblotting with biotinylated anti-HA antibody. Total cell lysates were analyzed by immunoblotting with biotin-HA to detect Rem or by immunoblotting with biotin-Flag to detect β<sub>1b</sub>. Results are representative of two independent experiments. **B**, TsA201 cells were transiently co-transfected with plasmids expressing 3xFlag-tagged Rem, Rem<sup>R200A</sup>, Rem<sup>L227A</sup>, or Rem<sup>R200A/L227A</sup> and either empty pCDNA3.1+3xHAa (vector control) or HA-tagged CCT-FL. Co-immunoprecipitation was performed with anti-HA antibody and interaction with Rem examined by immunoblotting with biotinylated FLAG antibody. Total cell lysates were analyzed by immunoblotting with anti-HA to detect CCT or by immunoblotting with anti-Flag to detect Rem or Rem mutants. Results are representative of two independent experiments. **C**, TsA201 cells were transfected with plasmids expressing Ca<sub>v</sub>1.2, β<sub>1b</sub> and either GFP-Rem<sup>R200A</sup>, GFP-Rem<sup>L227A</sup>, or GFP-Rem<sup>R200A/L227A</sup>. Current was examined using the whole-cell patch clamp configuration in the presence of 30 mM Ba<sup>2+</sup>.

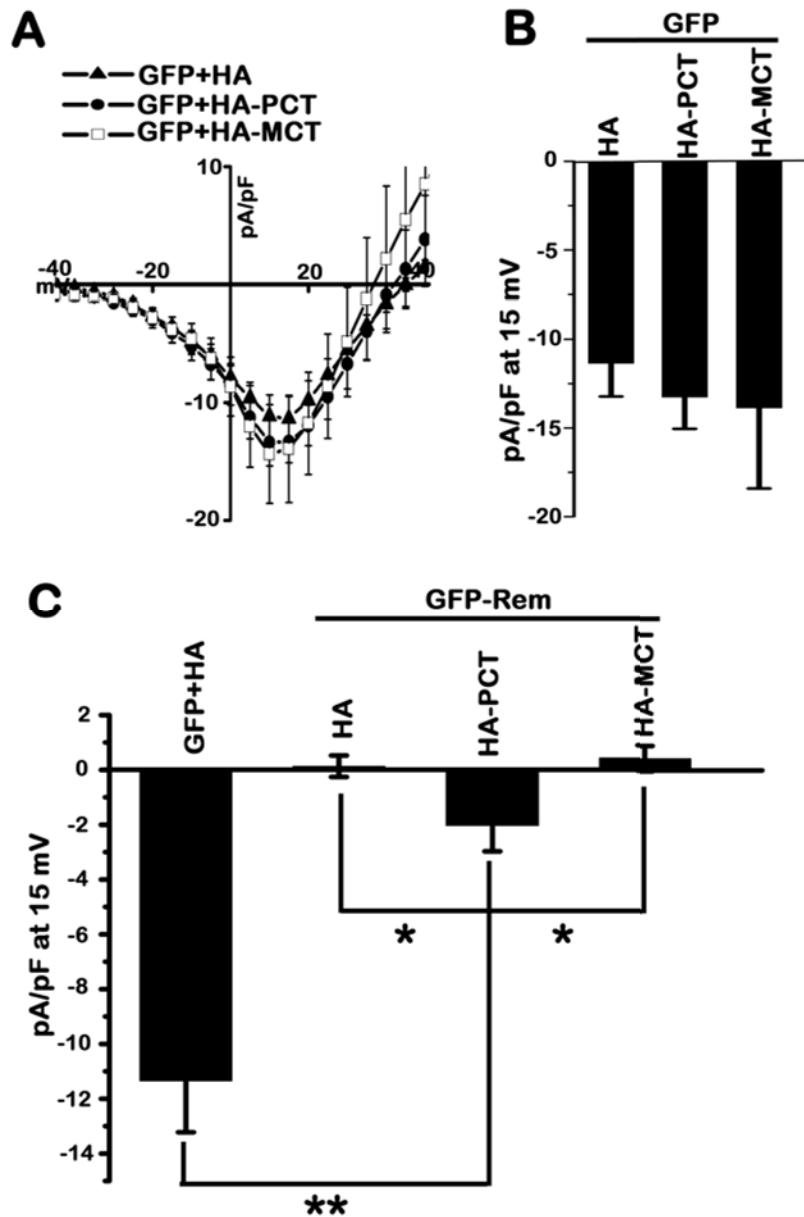

### Reviewer Figure R2

#### Co-expression of PCT partially recovers L-type current from Rem-mediated regulation in HIT-T15 cells.

**A**, Current-voltage relationships were determined for HIT-T15 cells co-transfected with GFP+HA (filled triangles, n=9), GFP+HA-PCT (filled circles, n=6) or GFP+HA-MCT (open squares, n=7) in the presence of 30 mM Ba<sup>2+</sup>. **B**, Current density at 15mV is displayed for experiments in panel A. There is no significant difference between the treatments. **C**, Current density at 15 mV from HIT-T15 cells co-transfected with GFP+HA (n=9), GFP-Rem+HA (n=9), GFP-Rem+HA-PCT (n=13), or GFP-Rem+HA-MCT (n=15). The error bars represent the standard error of the mean. Analysis of the results by student's t test revealed a significant difference between treatments denoted by single (P<0.05) or double (P<0.00005) asterisks.
